# Supplementary material
Source: PubMed Central journal article supplement (PMC5145771)
Supplement: NIHMS815295-supplement-Supplement_Online_Only_tables_and_figures.pdf [file NIHMS815295-supplement-Supplement_Online_Only_tables_and_figures.pdf]

## Supplement

---

1  
2  
3  
4  
5  
6  
7  
8  
9  
10  
11  
12  
13  
14  
15  
16  
17  
18  
19  
20  
21  
22  
23  
24  
25  
26  
27  
28  
29  
30  
31  
32  
33

**eTable 1.** Summary of Analysis Approaches for the 16-Week Primary Outcome

**eTable 2.** Cross Tabulation of Baseline versus 16-Week Amblyopic-Eye Visual Acuity by Treatment Group

**eTable 3.** Mean Change (LogMAR Line) in Amblyopic-Eye Visual Acuity from Baseline to 16 Weeks by Treatment Group according to Subgroups of Baseline Factors

**eTable 4.** Randot Stereoacuity at Baseline and 16-Week Primary Outcome by Treatment Group

**eTable 5.** Median Change in Stereoacuity (Log Seconds of Arc) from Baseline to 16 Weeks by Treatment Group according to Subgroups of Baseline Factors

**eTable 6.** Change in Mean Fellow-Eye Visual Acuity from Baseline to 16 Weeks by Treatment Group

**eTable 7.** Distribution of Diplopia Frequency at 16 Weeks and Maximum Frequency of Diplopia across Follow-up according to Parent / Participant Responses by Treatment Group

**eFigure 1.** Change in Amblyopic-Eye Visual Acuity from Baseline across Follow-up Visits

**eFigure 2.** Relationship between Change in 4-Week Outcomes and Objective Compliance Measures in the Binocular Group

**eFigure 3.** Relationship between Change in 16-Week Outcomes and Objective Compliance Measures in the Binocular Group

**eFigure 4.** Relationship between Change in Amblyopic-Eye VA from Baseline to 4 Weeks and Objective Compliance Measures in the Binocular Group at 4 Weeks according to Baseline Subgroups of Age with and without Prior Amblyopia Treatment

**eFigure 5.** Relationship between Change in Amblyopic-Eye VA from Baseline to 16 Weeks and Objective Compliance Measures in the Binocular Group at 16 Weeks according to Baseline Subgroups of Age with and without Prior Amblyopia Treatment

**eFigure 6.** Relationship between Change in Stereoacuity from Baseline to 4 Weeks and Objective Compliance Measures in the Binocular Group at 4 Weeks according to Baseline Subgroups of Age with and without Prior Amblyopia Treatment

**eFigure 7.** Relationship between Change in Stereoacuity from Baseline to 16 Weeks and Objective Compliance Measures in the Binocular Group at 16 Weeks according to Baseline Subgroups of Age with and without Prior Amblyopia Treatment

34 **eTable 1. Summary of Analysis Approaches for the 16-Week Primary Outcome**

| Analysis Approach <sup>a</sup>                                                                                                                                                                                                          | Adjusted Treatment Group Difference (Line) <sup>b</sup><br>(Patching – Binocular Group) | Upper Limit of 95% CI (Line) <sup>c</sup> |
|-----------------------------------------------------------------------------------------------------------------------------------------------------------------------------------------------------------------------------------------|-----------------------------------------------------------------------------------------|-------------------------------------------|
| Primary Analysis: Modified intent-to-treat analysis limited to participants with a 16-week exam completed within the analysis window (14 to <20 weeks after randomization).<br>No imputation for missing data                           | 0.31                                                                                    | 0.53                                      |
| Include multiple imputation for participants with a missing 16-week exam (n=15) or a 16-week exam outside the analysis window (n=7) based on baseline age and all available amblyopic-eye visual acuities from visits prior to 16 weeks | 0.31                                                                                    | 0.54                                      |
| Include 16-week exams completed outside the analysis window (14 to 28 weeks after randomization, n=7)                                                                                                                                   | 0.33                                                                                    | 0.56                                      |
| Exclude 16-week exams completed outside the 16 ± 1 week protocol window (n=35)                                                                                                                                                          | 0.30                                                                                    | 0.53                                      |
| Exclude 16-week exams from participants later found to be ineligible (n=7)                                                                                                                                                              | 0.30                                                                                    | 0.53                                      |
| Exclude participants who received alternative treatment for ≥ 1 week during follow-up (n=4)                                                                                                                                             | 0.33                                                                                    | 0.55                                      |

35 <sup>a</sup> For analyses other than the primary analysis, the modification to the primary analysis is specified.

36 <sup>b</sup> Treatment group difference (Patching – Binocular Group) in mean change in amblyopic-eye visual acuity from baseline to 16  
37 weeks, adjusted for baseline covariates of age and amblyopic-eye visual acuity.

38 <sup>c</sup> Upper limit of the 1-sided 95% confidence interval computed on the treatment group difference (Patching – Binocular Group),  
39 adjusted for baseline covariates of age and amblyopic-eye visual acuity. The upper-limit of the 1-sided 95% confidence interval for  
40 all of the analysis approaches exceeded the pre-specified non-inferiority margin of 0.5 line, consistent with the primary analysis  
41 result.

42

43 **eTable 2. Cross Tabulation of Baseline versus 16-Week Amblyopic-Eye Visual Acuity by Treatment Group**  
 44

| <b>Binocular Group (N=177)</b>                                 | <b>Distribution of Amblyopic-eye Visual Acuity at Baseline</b> |    |                 |    |                 |    |                 |    |                 |    |                 |    |                 |    |                 |    |
|----------------------------------------------------------------|----------------------------------------------------------------|----|-----------------|----|-----------------|----|-----------------|----|-----------------|----|-----------------|----|-----------------|----|-----------------|----|
|                                                                | 20/40                                                          |    | 20/50           |    | 20/63           |    | 20/80           |    | 20/100          |    | 20/125          |    | 20/160          |    | 20/200          |    |
|                                                                | (68-72 Letters)                                                |    | (63-67 Letters) |    | (58-62 Letters) |    | (53-57 Letters) |    | (48-52 Letters) |    | (43-47 Letters) |    | (38-42 Letters) |    | (33-37 Letters) |    |
|                                                                | N                                                              | %  | N               | %  | N               | %  | N               | %  | N               | %  | N               | %  | N               | %  | N               | %  |
| <b>Distribution of Amblyopic-eye Visual Acuity at 16 Weeks</b> |                                                                |    |                 |    |                 |    |                 |    |                 |    |                 |    |                 |    |                 |    |
| 20/200 (33-37 Letters)                                         | 0                                                              | 0  | 0               | 0  | 0               | 0  | 0               | 0  | 1               | 6  | 0               | 0  | 0               | 0  | 1               | 20 |
| 20/160 (38-42 Letters)                                         | 0                                                              | 0  | 0               | 0  | 0               | 0  | 0               | 0  | 0               | 0  | 0               | 0  | 1               | 17 | 1               | 20 |
| 20/125 (43-47 Letters)                                         | 0                                                              | 0  | 0               | 0  | 0               | 0  | 1               | 3  | 2               | 13 | 1               | 13 | 4               | 67 | 2               | 40 |
| 20/100 (48-52 Letters)                                         | 0                                                              | 0  | 1               | 2  | 0               | 0  | 2               | 7  | 4               | 25 | 3               | 38 | 1               | 17 | 1               | 20 |
| 20/80 (53-57 Letters)                                          | 0                                                              | 0  | 1               | 2  | 3               | 9  | 7               | 24 | 5               | 31 | 2               | 25 | 0               | 0  | 0               | 0  |
| 20/63 (58-62 Letters)                                          | 1                                                              | 4  | 7               | 13 | 6               | 19 | 7               | 24 | 3               | 19 | 1               | 13 | 0               | 0  | 0               | 0  |
| 20/50 (63-67 Letters)                                          | 2                                                              | 8  | 13              | 24 | 8               | 25 | 6               | 21 | 1               | 6  | 0               | 0  | 0               | 0  | 0               | 0  |
| 20/40 (68-72 Letters)                                          | 8                                                              | 31 | 12              | 22 | 8               | 25 | 4               | 14 | 0               | 0  | 0               | 0  | 0               | 0  | 0               | 0  |
| 20/32 (73-77 Letters)                                          | 10                                                             | 38 | 16              | 29 | 6               | 19 | 1               | 3  | 0               | 0  | 0               | 0  | 0               | 0  | 0               | 0  |
| 20/25 (78-82 Letters)                                          | 3                                                              | 12 | 3               | 5  | 0               | 0  | 1               | 3  | 0               | 0  | 1               | 13 | 0               | 0  | 0               | 0  |
| 20/20 (83-87 Letters)                                          | 1                                                              | 4  | 2               | 4  | 0               | 0  | 0               | 0  | 0               | 0  | 0               | 0  | 0               | 0  | 0               | 0  |
| 20/16 (88-92 Letters)                                          | 1                                                              | 4  | 0               | 0  | 1               | 3  | 0               | 0  | 0               | 0  | 0               | 0  | 0               | 0  | 0               | 0  |

45

46 **eTable 2. (continued)**  
47

| Patching Group (N=186) <sup>a</sup>                            | Distribution of Amblyopic-Eye Visual Acuity at Baseline <sup>b</sup> |    |                             |    |                             |    |                             |    |                              |    |                              |    |                              |    |                              |    |
|----------------------------------------------------------------|----------------------------------------------------------------------|----|-----------------------------|----|-----------------------------|----|-----------------------------|----|------------------------------|----|------------------------------|----|------------------------------|----|------------------------------|----|
|                                                                | 20/40<br>(68-72<br>Letters)                                          |    | 20/50<br>(63-67<br>Letters) |    | 20/63<br>(58-62<br>Letters) |    | 20/80<br>(53-57<br>Letters) |    | 20/100<br>(48-52<br>Letters) |    | 20/125<br>(43-47<br>Letters) |    | 20/160<br>(38-42<br>Letters) |    | 20/200<br>(33-37<br>Letters) |    |
|                                                                | N                                                                    | %  | N                           | %  | N                           | %  | N                           | %  | N                            | %  | N                            | %  | N                            | %  | N                            | %  |
| <b>Distribution of Amblyopic-eye Visual Acuity at 16 Weeks</b> |                                                                      |    |                             |    |                             |    |                             |    |                              |    |                              |    |                              |    |                              |    |
| 20/200 (33-37 Letters)                                         | 0                                                                    | 0  | 0                           | 0  | 0                           | 0  | 0                           | 0  | 0                            | 0  | 0                            | 0  | 1                            | 14 | 0                            | 0  |
| 20/160 (38-42 Letters)                                         | 0                                                                    | 0  | 0                           | 0  | 0                           | 0  | 0                           | 0  | 0                            | 0  | 0                            | 0  | 2                            | 29 | 1                            | 33 |
| 20/125 (43-47 Letters)                                         | 0                                                                    | 0  | 0                           | 0  | 0                           | 0  | 0                           | 0  | 0                            | 0  | 1                            | 25 | 1                            | 14 | 0                            | 0  |
| 20/100 (48-52 Letters)                                         | 0                                                                    | 0  | 0                           | 0  | 0                           | 0  | 1                           | 4  | 3                            | 25 | 0                            | 0  | 2                            | 29 | 1                            | 33 |
| 20/80 (53-57 Letters)                                          | 0                                                                    | 0  | 0                           | 0  | 2                           | 4  | 7                           | 29 | 3                            | 25 | 3                            | 75 | 1                            | 14 | 1                            | 33 |
| 20/63 (58-62 Letters)                                          | 1                                                                    | 2  | 2                           | 4  | 8                           | 18 | 8                           | 33 | 3                            | 25 | 0                            | 0  | 0                            | 0  | 0                            | 0  |
| 20/50 (63-67 Letters)                                          | 5                                                                    | 12 | 14                          | 28 | 14                          | 31 | 3                           | 13 | 2                            | 17 | 0                            | 0  | 0                            | 0  | 0                            | 0  |
| 20/40 (68-72 Letters)                                          | 7                                                                    | 17 | 15                          | 30 | 10                          | 22 | 4                           | 17 | 1                            | 8  | 0                            | 0  | 0                            | 0  | 0                            | 0  |
| 20/32 (73-77 Letters)                                          | 9                                                                    | 22 | 8                           | 16 | 9                           | 20 | 1                           | 4  | 0                            | 0  | 0                            | 0  | 0                            | 0  | 0                            | 0  |
| 20/25 (78-82 Letters)                                          | 14                                                                   | 34 | 6                           | 12 | 2                           | 4  | 0                           | 0  | 0                            | 0  | 0                            | 0  | 0                            | 0  | 0                            | 0  |
| 20/20 (83-87 Letters)                                          | 5                                                                    | 12 | 5                           | 10 | 0                           | 0  | 0                           | 0  | 0                            | 0  | 0                            | 0  | 0                            | 0  | 0                            | 0  |
| 20/16 (88-92 Letters)                                          | 0                                                                    | 0  | 0                           | 0  | 0                           | 0  | 0                           | 0  | 0                            | 0  | 0                            | 0  | 1                            | 14 | 0                            | 0  |

48  
49 <sup>a</sup> The distribution of visual acuity level at baseline and the 16-week visit was only tabulated for participants who completed the 16-week visit within the pre-defined analysis window (14  
50 to <20 weeks after randomization).

51 <sup>b</sup> Percentages reflect the distribution of 16-week amblyopic-eye visual acuity scores within each level of visual acuity at baseline by treatment group.

52 **eTable 3. Mean Change (LogMAR Line) in Amblyopic-Eye Visual Acuity from**  
53 **Baseline to 16 Weeks by Treatment Group according to Subgroups of Baseline**  
54 **Factors<sup>a</sup>**  
55

|                                                           | Binocular Group (N=177) |                |                                |              | Patching Group (N=186)  |                |                                |              | P-value<br>(2-sided) <sup>c</sup> |
|-----------------------------------------------------------|-------------------------|----------------|--------------------------------|--------------|-------------------------|----------------|--------------------------------|--------------|-----------------------------------|
|                                                           | Baseline VA<br>(logMAR) |                | 16-Week VA<br>Change<br>(Line) |              | Baseline VA<br>(logMAR) |                | 16-Week VA<br>Change<br>(Line) |              |                                   |
|                                                           | N                       | Mean<br>(SD)   | N                              | Mean<br>(SD) | N                       | Mean<br>(SD)   | N                              | Mean<br>(SD) |                                   |
| <b>Overall</b>                                            | 177                     | 0.52<br>(0.17) | 177                            | 1.1 (1.5)    | 186                     | 0.48<br>(0.16) | 186                            | 1.3 (1.3)    |                                   |
| <b>Gender</b>                                             |                         |                |                                |              |                         |                |                                |              |                                   |
| Female                                                    | 89                      | 0.53<br>(0.19) | 89                             | 1.2 (1.5)    | 83                      | 0.50<br>(0.17) | 83                             | 1.4 (1.2)    | 0.83                              |
| Male                                                      | 88                      | 0.50<br>(0.16) | 88                             | 1.0 (1.4)    | 103                     | 0.47<br>(0.16) | 103                            | 1.3 (1.3)    |                                   |
| <b>Race/Ethnicity<sup>b</sup></b>                         |                         |                |                                |              |                         |                |                                |              |                                   |
| White/Non-Hispanic                                        | 122                     | 0.51<br>(0.17) | 122                            | 1.0 (1.5)    | 139                     | 0.49<br>(0.17) | 139                            | 1.3 (1.2)    | 0.54                              |
| Non-White or Hispanic                                     | 54                      | 0.52<br>(0.17) | 54                             | 1.2 (1.5)    | 44                      | 0.48<br>(0.14) | 44                             | 1.3 (1.4)    |                                   |
| <b>Baseline Amblyopic-Eye Visual Acuity<br/>(Snellen)</b> |                         |                |                                |              |                         |                |                                |              |                                   |
| 20/80 to 20/200                                           | 64                      | 0.70<br>(0.13) | 64                             | 1.1 (1.6)    | 50                      | 0.70<br>(0.13) | 50                             | 1.3 (1.3)    |                                   |
| 20/63                                                     | 32                      | 0.49<br>(0.03) | 32                             | 1.3 (1.6)    | 45                      | 0.50<br>(0.03) | 45                             | 1.4 (1.3)    | 0.99                              |
| 20/50                                                     | 55                      | 0.41<br>(0.02) | 55                             | 1.0 (1.3)    | 50                      | 0.40<br>(0.02) | 50                             | 1.3 (1.3)    |                                   |
| 20/40                                                     | 26                      | 0.31<br>(0.03) | 26                             | 0.8 (1.2)    | 41                      | 0.31<br>(0.02) | 41                             | 1.2 (1.2)    |                                   |
| <b>Baseline Stereoacuity</b>                              |                         |                |                                |              |                         |                |                                |              |                                   |
| Nil                                                       | 68                      | 0.58<br>(0.18) | 68                             | 0.7 (1.3)    | 55                      | 0.54<br>(0.18) | 55                             | 1.1 (1.1)    | 0.33                              |
| Better than Nil                                           | 109                     | 0.47<br>(0.15) | 109                            | 1.3 (1.5)    | 131                     | 0.46<br>(0.15) | 131                            | 1.4 (1.3)    |                                   |
| <b>Presence of a Near Heterotropia at<br/>Baseline</b>    |                         |                |                                |              |                         |                |                                |              |                                   |
| No                                                        | 122                     | 0.52<br>(0.17) | 122                            | 1.1 (1.3)    | 117                     | 0.49<br>(0.17) | 117                            | 1.3 (1.2)    | 0.23                              |
| Yes                                                       | 55                      | 0.51<br>(0.17) | 55                             | 0.9 (1.7)    | 69                      | 0.48<br>(0.15) | 69                             | 1.4 (1.3)    |                                   |
| <b>Age at Baseline (Years)</b>                            |                         |                |                                |              |                         |                |                                |              |                                   |
| 5 to <7                                                   | 39                      | 0.53<br>(0.19) | 39                             | 1.9 (1.8)    | 49                      | 0.45<br>(0.13) | 49                             | 2.0 (1.4)    | 0.80                              |
| 7 to <13                                                  | 138                     | 0.51<br>(0.17) | 138                            | 0.8 (1.2)    | 137                     | 0.50<br>(0.17) | 137                            | 1.1 (1.1)    |                                   |

|                                                           |                    | Binocular Group (N=177) |                |                                |              | Patching Group (N=186)  |                |                                |              | P-value<br>(2-sided) <sup>c</sup> |
|-----------------------------------------------------------|--------------------|-------------------------|----------------|--------------------------------|--------------|-------------------------|----------------|--------------------------------|--------------|-----------------------------------|
|                                                           |                    | Baseline VA<br>(logMAR) |                | 16-Week VA<br>Change<br>(Line) |              | Baseline VA<br>(logMAR) |                | 16-Week VA<br>Change<br>(Line) |              |                                   |
|                                                           |                    | N                       | Mean<br>(SD)   | N                              | Mean<br>(SD) | N                       | Mean<br>(SD)   | N                              | Mean<br>(SD) |                                   |
| <b>Prior Amblyopia Treatment</b>                          |                    |                         |                |                                |              |                         |                |                                |              |                                   |
| No                                                        |                    | 41                      | 0.51<br>(0.15) | 41                             | 1.9 (1.5)    | 39                      | 0.51<br>(0.17) | 39                             | 2.2 (1.3)    | 0.87                              |
| Yes                                                       |                    | 136                     | 0.52<br>(0.18) | 136                            | 0.8 (1.4)    | 147                     | 0.48<br>(0.16) | 14<br>7                        | 1.1 (1.2)    |                                   |
| <b>Prior Treatment within Age at Baseline<br/>(Years)</b> |                    |                         |                |                                |              |                         |                |                                |              |                                   |
| 5 to <7                                                   | No Prior Treatment | 19                      | 0.50<br>(0.16) | 19                             | 2.5 (1.5)    | 19                      | 0.46<br>(0.13) | 19                             | 2.8 (0.8)    |                                   |
|                                                           | Prior Treatment    | 20                      | 0.56<br>(0.21) | 20                             | 1.4 (1.9)    | 30                      | 0.44<br>(0.13) | 30                             | 1.4 (1.4)    |                                   |
| 7 to <13                                                  | No Prior Treatment | 22                      | 0.52<br>(0.14) | 22                             | 1.3 (1.2)    | 20                      | 0.56<br>(0.19) | 20                             | 1.5 (1.3)    |                                   |
|                                                           | Prior Treatment    | 116                     | 0.51<br>(0.17) | 116                            | 0.7 (1.2)    | 117                     | 0.49<br>(0.17) | 11<br>7                        | 1.0 (1.1)    |                                   |

VA = visual acuity, logMAR = logarithm of the minimum angle of resolution; SD = standard deviation

<sup>a</sup> Analyses were limited to participants who completed the 16-week visit within the pre-defined analysis window (14 to <20 weeks after randomization).

<sup>b</sup> Four participants (1 binocular group, 3 patching group) were excluded due to unknown/not reported race/ethnicity classification.

56  
57  
58  
59 <sup>c</sup> P-value based on the addition of an interaction term between treatment group and each factor to the primary analysis model. Baseline factors of age and amblyopic-eye visual acuity were treated as continuous variables in the regression models. All of the subgroup factors were pre-specified except for baseline stereoacuity.

**eTable 4. Randot Stereoacuity at Baseline and 16-Week Primary Outcome by Treatment Group**

| All Participants                                        | Baseline                |    |                        |    | 16-Week Visit           |    |                        |    |
|---------------------------------------------------------|-------------------------|----|------------------------|----|-------------------------|----|------------------------|----|
|                                                         | Binocular Group (N=190) |    | Patching Group (N=195) |    | Binocular Group (N=182) |    | Patching Group (N=188) |    |
|                                                         | N                       | %  | N                      | %  | N                       | %  | N                      | %  |
| <b>Randot Stereoacuity (Seconds of arc)<sup>a</sup></b> |                         |    |                        |    |                         |    |                        |    |
| Missing/Not Done                                        | 0                       | 0  | 0                      | 0  | 1                       | <1 | 0                      | 0  |
| Nil                                                     | 69                      | 36 | 57                     | 29 | 62                      | 34 | 50                     | 27 |
| 2000                                                    | 28                      | 15 | 37                     | 19 | 32                      | 18 | 32                     | 17 |
| 800                                                     | 18                      | 9  | 26                     | 13 | 19                      | 10 | 28                     | 15 |
| 400                                                     | 17                      | 9  | 19                     | 10 | 14                      | 8  | 17                     | 9  |
| 200                                                     | 23                      | 12 | 18                     | 9  | 15                      | 8  | 27                     | 14 |
| 100                                                     | 23                      | 12 | 23                     | 12 | 17                      | 9  | 19                     | 10 |
| 60                                                      | 10                      | 5  | 9                      | 5  | 10                      | 5  | 11                     | 6  |
| 40                                                      | 2                       | 1  | 6                      | 3  | 12                      | 7  | 4                      | 2  |
| Median                                                  | 2000                    |    | 800                    |    | 2000                    |    | 800                    |    |

60

| Participants without Strabismus                         | Baseline                |    |                       |    | 16-Week Visit           |    |                       |    |
|---------------------------------------------------------|-------------------------|----|-----------------------|----|-------------------------|----|-----------------------|----|
|                                                         | Binocular Group (N=107) |    | Patching Group (N=92) |    | Binocular Group (N=105) |    | Patching Group (N=90) |    |
|                                                         | N                       | %  | N                     | %  | N                       | %  | N                     | %  |
| <b>Randot Stereoacuity (Seconds of arc)<sup>a</sup></b> |                         |    |                       |    |                         |    |                       |    |
| Missing/Not Done                                        | 0                       | 0  | 0                     | 0  | 1                       | <1 | 0                     | 0  |
| Nil                                                     | 29                      | 27 | 13                    | 14 | 23                      | 22 | 13                    | 14 |
| 2000                                                    | 14                      | 13 | 17                    | 18 | 14                      | 13 | 12                    | 13 |
| 800                                                     | 8                       | 7  | 11                    | 12 | 12                      | 11 | 14                    | 16 |
| 400                                                     | 10                      | 9  | 10                    | 11 | 10                      | 10 | 10                    | 11 |
| 200                                                     | 18                      | 17 | 12                    | 13 | 12                      | 11 | 17                    | 19 |
| 100                                                     | 19                      | 18 | 17                    | 18 | 14                      | 13 | 15                    | 17 |
| 60                                                      | 7                       | 7  | 7                     | 8  | 9                       | 9  | 6                     | 7  |
| 40                                                      | 2                       | 2  | 5                     | 5  | 10                      | 10 | 3                     | 3  |
| Median                                                  | 400                     |    | 400                   |    | 400                     |    | 400                   |    |

61

62

63

64

65

66

67

<sup>a</sup> Results of the Randot Butterfly stereoacuity test were analyzed as 2000 seconds of arc (if correct response). Nil was defined as an incorrect response on the butterfly (n=67 and n=56 in binocular and patching groups at baseline, respectively; n=61 and n=50 in binocular and patching groups at 16 weeks, respectively), or on the 800 seconds of arc level of the Randot Preschool stereoacuity test if the butterfly was not attempted (n=2 and n=1 in binocular treatment and patching groups at baseline, respectively; n=1 and n=0 in the binocular and patching groups at 16 weeks, respectively).

**eTable 4. (continued)**

|                                                                                     | All Participants <sup>a</sup> |    |                        |    | Participants without Strabismus <sup>a</sup> |    |                       |    |
|-------------------------------------------------------------------------------------|-------------------------------|----|------------------------|----|----------------------------------------------|----|-----------------------|----|
|                                                                                     | Binocular Group (N=181)       |    | Patching Group (N=188) |    | Binocular Group (N=104)                      |    | Patching Group (N=90) |    |
|                                                                                     | N                             | %  | N                      | %  | N                                            | %  | N                     | %  |
| <b>Change in Randot Stereoacuity from Baseline to 16 Weeks (Levels)<sup>b</sup></b> |                               |    |                        |    |                                              |    |                       |    |
| ≥ 2 Levels Worse                                                                    | 19                            | 11 | 24                     | 13 | 12                                           | 12 | 14                    | 16 |
| Within 1 Level                                                                      | 130                           | 72 | 122                    | 65 | 67                                           | 64 | 58                    | 64 |
| ≥ 2 Levels Better                                                                   | 32                            | 18 | 42                     | 22 | 25                                           | 24 | 18                    | 20 |
|                                                                                     | 78                            |    |                        |    |                                              |    |                       |    |

<sup>a</sup> Excludes participants with 'Missing/Not Done' stereoacuity responses at either baseline and/or the 16-week primary outcome visit.

<sup>b</sup> P = 0.66 and P = 0.19 for the overall cohort and for participants without strabismus, respectively, from Wilcoxon rank-sum test for difference between treatment groups in distribution of levels of change from baseline to 16 weeks.

79  
80  
81  
82  
83



84 **eTable 5. Median Change in Stereoacuity (Log Seconds of Arc) from Baseline to**  
 85 **16 Weeks by Treatment Group according to Subgroups of Baseline Factors <sup>a</sup>**  
 86

|                                                       | Binocular Group (N=177) |                     |                                 |                     | Patching Group (N=186) |                     |                                 |                     |
|-------------------------------------------------------|-------------------------|---------------------|---------------------------------|---------------------|------------------------|---------------------|---------------------------------|---------------------|
|                                                       | Baseline Stereoacuity   |                     | Stereoacuity Change at 16 Weeks |                     | Baseline Stereoacuity  |                     | Stereoacuity Change at 16 Weeks |                     |
|                                                       | N                       | Median <sup>b</sup> | N                               | Median <sup>b</sup> | N                      | Median <sup>b</sup> | N                               | Median <sup>b</sup> |
| <b>Overall</b>                                        | <b>177</b>              | <b>3.30</b>         | <b>176</b>                      | <b>0</b>            | <b>186</b>             | <b>2.90</b>         | <b>186</b>                      | <b>0</b>            |
| <b>Gender</b>                                         |                         |                     |                                 |                     |                        |                     |                                 |                     |
| Female                                                | 89                      | 3.30                | 89                              | 0                   | 83                     | 2.90                | 83                              | 0                   |
| Male                                                  | 88                      | 3.30                | 87                              | 0                   | 103                    | 3.30                | 103                             | 0                   |
| <b>Race/Ethnicity<sup>c</sup></b>                     |                         |                     |                                 |                     |                        |                     |                                 |                     |
| White/Non-Hispanic                                    | 122                     | 3.30                | 122                             | 0                   | 139                    | 3.30                | 139                             | 0                   |
| Non-White or Hispanic                                 | 54                      | 3.30                | 53                              | 0                   | 44                     | 2.90                | 44                              | 0                   |
| <b>Baseline Amblyopic-Eye Visual Acuity (Snellen)</b> |                         |                     |                                 |                     |                        |                     |                                 |                     |
| 20/80 to 20/200                                       | 64                      | 3.60                | 63                              | 0                   | 50                     | 3.30                | 50                              | 0                   |
| 20/63                                                 | 32                      | 3.30                | 32                              | 0                   | 45                     | 2.90                | 45                              | 0                   |
| 20/50                                                 | 55                      | 2.90                | 55                              | 0                   | 50                     | 2.90                | 50                              | 0                   |
| 20/40                                                 | 26                      | 2.30                | 26                              | 0.11                | 41                     | 2.60                | 41                              | 0                   |
| <b>Baseline Stereoacuity</b>                          |                         |                     |                                 |                     |                        |                     |                                 |                     |
| Nil                                                   | 68                      | 3.60                | 67                              | 0                   | 55                     | 3.60                | 55                              | 0                   |
| Better than Nil                                       | 109                     | 2.60                | 109                             | 0                   | 131                    | 2.60                | 131                             | 0                   |
| <b>Presence of a Near Heterotropia at Baseline</b>    |                         |                     |                                 |                     |                        |                     |                                 |                     |
| No                                                    | 122                     | 2.90                | 121                             | 0                   | 117                    | 2.60                | 117                             | 0                   |
| Yes                                                   | 55                      | 3.60                | 55                              | 0                   | 69                     | 3.30                | 69                              | 0                   |
| <b>Age at Baseline (Years)</b>                        |                         |                     |                                 |                     |                        |                     |                                 |                     |
| 5 to <7                                               | 39                      | 3.30                | 38                              | 0                   | 49                     | 2.90                | 49                              | 0                   |
| 7 to <13                                              | 138                     | 3.30                | 138                             | 0                   | 137                    | 3.30                | 137                             | 0                   |
| <b>Prior Amblyopia Treatment</b>                      |                         |                     |                                 |                     |                        |                     |                                 |                     |
| No                                                    | 41                      | 2.30                | 41                              | 0.22                | 39                     | 2.30                | 39                              | 0                   |
| Yes                                                   | 136                     | 3.30                | 135                             | 0                   | 147                    | 3.30                | 147                             | 0                   |
| <b>Prior Treatment within Age at Baseline (Years)</b> |                         |                     |                                 |                     |                        |                     |                                 |                     |
| 5 to <7                                               |                         |                     |                                 |                     |                        |                     |                                 |                     |
| No Prior Treatment                                    | 19                      | 2.30                | 19                              | 0.22                | 19                     | 2.30                | 19                              | 0                   |
| Prior Treatment                                       | 20                      | 3.30                | 19                              | 0                   | 30                     | 3.30                | 30                              | 0                   |
| 7 to <13                                              |                         |                     |                                 |                     |                        |                     |                                 |                     |
| No Prior Treatment                                    | 22                      | 2.30                | 22                              | 0.20                | 20                     | 2.45                | 20                              | 0                   |
| Prior Treatment                                       | 116                     | 3.30                | 116                             | 0                   | 117                    | 3.30                | 117                             | 0                   |

<sup>a</sup> Analyses were limited to participants who completed the 16-week visit within the pre-defined analysis window (14 to <20 weeks after randomization).

<sup>b</sup> Baseline stereoacuity was measured as log seconds of arc as follows: 1.60 (40'), 1.78 (60'), 2.00 (100'), 2.30 (200'), 2.60 (400'), 2.90 (800'), 3.30 (2000') and 3.60 (nil). Change in stereoacuity was calculated as the difference in the log seconds of arc (baseline - 16 weeks).

<sup>c</sup> Four participants (1 binocular group, 3 patching group) were excluded due to unknown/not reported race/ethnicity classification.

**eTable 6. Change in Mean Fellow-Eye Visual Acuity from Baseline to 16 Weeks by Treatment Group**

87

|                                | Binocular Group<br>(N=182) |    | Patching Group<br>(N=188) |    |
|--------------------------------|----------------------------|----|---------------------------|----|
|                                | N                          | %  | N                         | %  |
| <b>Visual Acuity Change</b>    |                            |    |                           |    |
| 2 lines (10-14 letters) better | 6                          | 3  | 2                         | 1  |
| 1 line (5-9 letters) better    | 36                         | 20 | 30                        | 16 |
| 0 line (within 4 letters)      | 128                        | 70 | 133                       | 71 |
| 1 line (5-9 letters) worse     | 11                         | 6  | 22                        | 12 |
| 2 lines (10-14 letters) worse  | 1                          | <1 | 1                         | <1 |
| Mean (SD) Lines                | 0.30 (0.74)                |    | 0.15 (0.71)               |    |

88

89

SD = standard deviation

90 **eTable 7. Distribution of Diplopia Frequency at 16 Weeks and Maximum Frequency of Diplopia across Follow-up**  
 91 **according to Parent / Participant Responses by Treatment Group**  
 92

|                              | 16-Week Visit <sup>b</sup> |    |                        |    |                         |    |                        |    | Maximum Frequency of Reported Diplopia during Follow-up |    |                        |    |                         |    |                        |    |
|------------------------------|----------------------------|----|------------------------|----|-------------------------|----|------------------------|----|---------------------------------------------------------|----|------------------------|----|-------------------------|----|------------------------|----|
|                              | Parent <sup>a</sup>        |    |                        |    | Participant             |    |                        |    | Parent <sup>a</sup>                                     |    |                        |    | Participant             |    |                        |    |
|                              | Binocular Group (N=182)    |    | Patching Group (N=187) |    | Binocular Group (N=182) |    | Patching Group (N=188) |    | Binocular Group (N=182)                                 |    | Patching Group (N=188) |    | Binocular Group (N=182) |    | Patching Group (N=188) |    |
|                              | N                          | %  | N                      | %  | N                       | %  | N                      | %  | N                                                       | %  | N                      | %  | N                       | %  | N                      | %  |
| <b>Frequency of Diplopia</b> |                            |    |                        |    |                         |    |                        |    |                                                         |    |                        |    |                         |    |                        |    |
| Never                        | 176                        | 97 | 185                    | 99 | 166                     | 91 | 181                    | 96 | 172                                                     | 95 | 182                    | 97 | 153                     | 84 | 167                    | 89 |
| Less than once a week        | 5                          | 3  | 0                      | 0  | 5                       | 3  | 3                      | 2  | 6                                                       | 3  | 4                      | 2  | 6                       | 3  | 10                     | 5  |
| Once a week                  | 1                          | <1 | 2                      | 1  | 5                       | 3  | 3                      | 2  | 2                                                       | 1  | 1                      | <1 | 10                      | 5  | 4                      | 2  |
| Once a day                   | 0                          | 0  | 0                      | 0  | 2                       | 1  | 1                      | <1 | 2                                                       | 1  | 0                      | 0  | 8                       | 4  | 5                      | 3  |
| Up to 10 times a day         | 0                          | 0  | 0                      | 0  | 3                       | 2  | 0                      | 0  | 0                                                       | 0  | 1                      | <1 | 3                       | 2  | 2                      | 1  |
| >10 times a day              | 0                          | 0  | 0                      | 0  | 0                       | 0  | 0                      | 0  | 0                                                       | 0  | 0                      | 0  | 1                       | <1 | 0                      | 0  |
| All the time                 | 0                          | 0  | 0                      | 0  | 1                       | <1 | 0                      | 0  | 0                                                       | 0  | 0                      | 0  | 1                       | <1 | 0                      | 0  |

93  
 94 <sup>a</sup> The parental assessment may be missing if the parent was not available at the 16-week visit  
 95

96 <sup>b</sup> P=0.17 for the parental responses and P=0.05 for the participant responses on the diplopia assessment at the 16-week visit based on a Fisher exact test for the treatment group  
 97 comparison of the presence (yes/no) of diplopia.

98 <sup>b</sup> P=0.48 for the parental responses and P=0.02 for the participant responses on the diplopia assessment at the 16-week visit based on a Cochran-Armitage trend test (exact) for the  
 99 treatment group comparison of diplopia frequency.

100 <sup>b</sup> Two participants (1 per group) had monocular diplopia at the 16-week visit.  
 101

102 **eFigure 1. Change in Amblyopic-Eye Visual Acuity from Baseline across Follow-**  
 103 **up Visits**

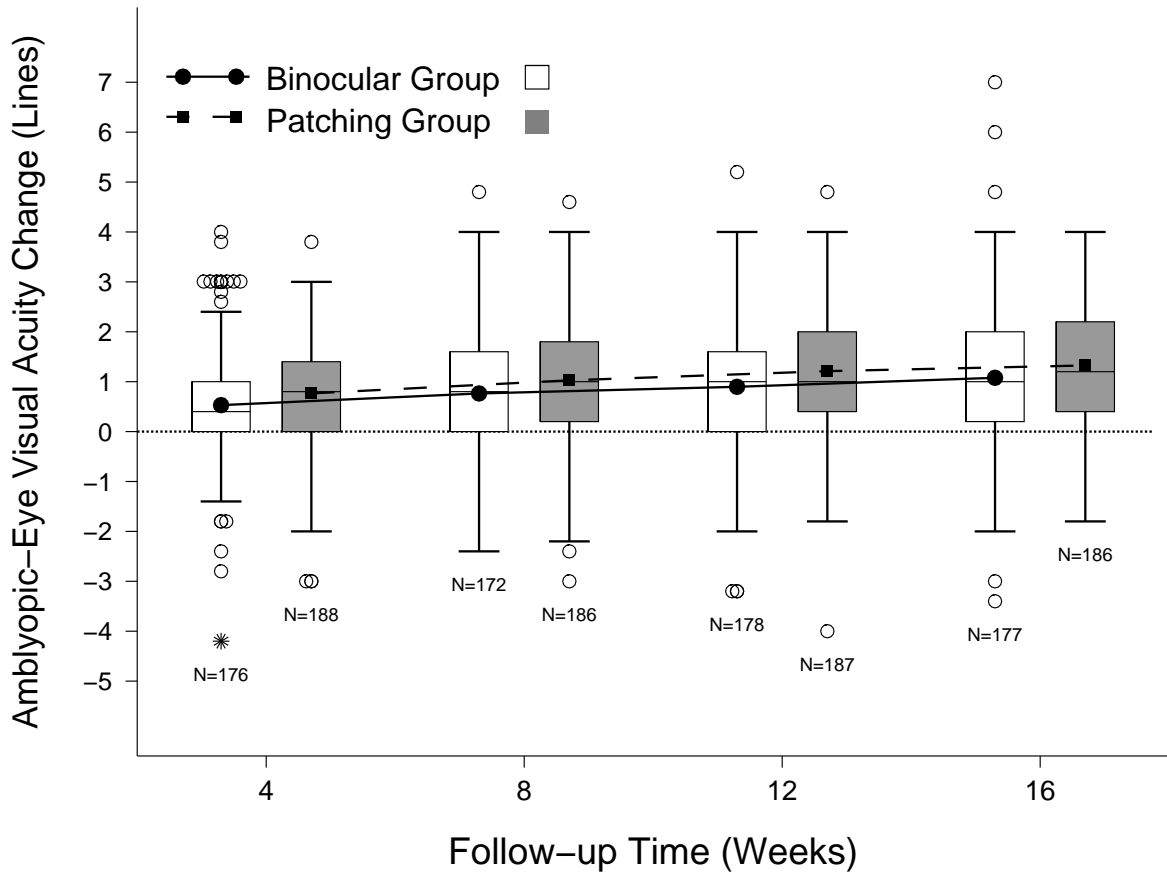

**Mean Treatment Group Improvement in Amblyopic-Eye Visual Acuity at Follow-up Visits**

| Treatment Group:       | 4-Week Visit | 8-Week Visit | 12-Week Visit | 16-Week Visit |
|------------------------|--------------|--------------|---------------|---------------|
| <b>Binocular Group</b> | 0.5 Line     | 0.8 Line     | 0.9 Line      | 1.1 Lines     |
| <b>Patching Group</b>  | 0.8 Line     | 1.0 Lines    | 1.2 Lines     | 1.3 Lines     |

104  
105

106  
107

### eFigure 2. Relationship between Change in 4-Week Outcomes and Objective Compliance Measures in the Binocular Group

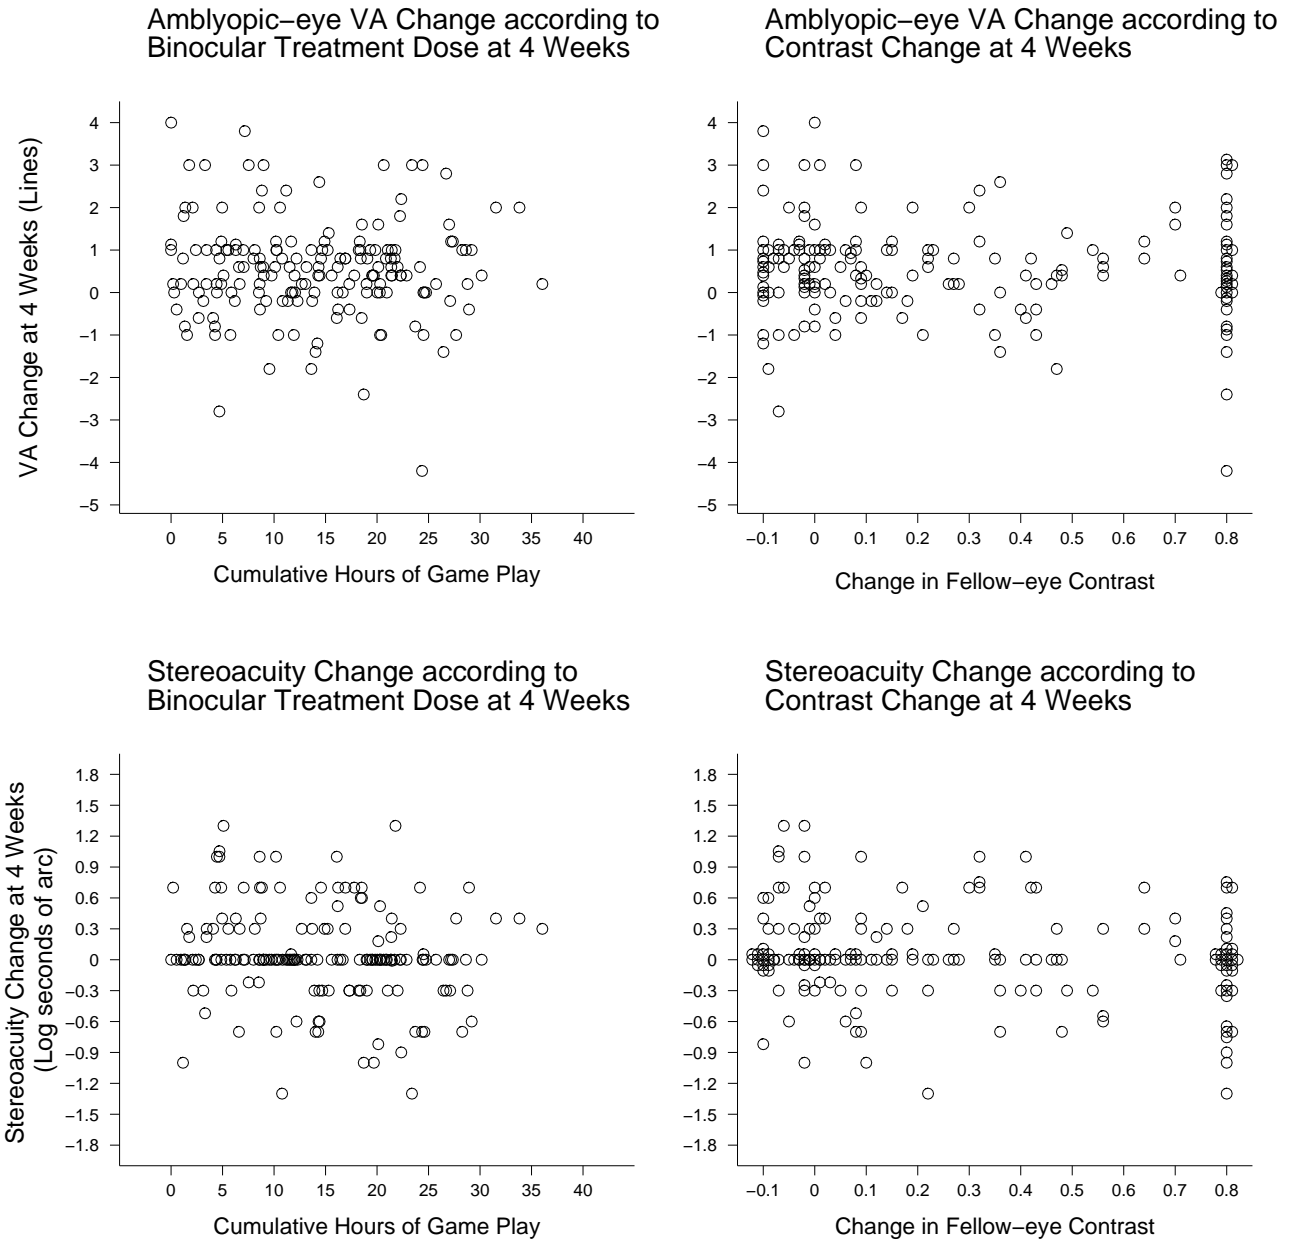

108  
109

110 **eFigure 3. Relationship between Change in 16-Week Outcomes and Objective**  
111 **Compliance Measures in the Binocular Group**

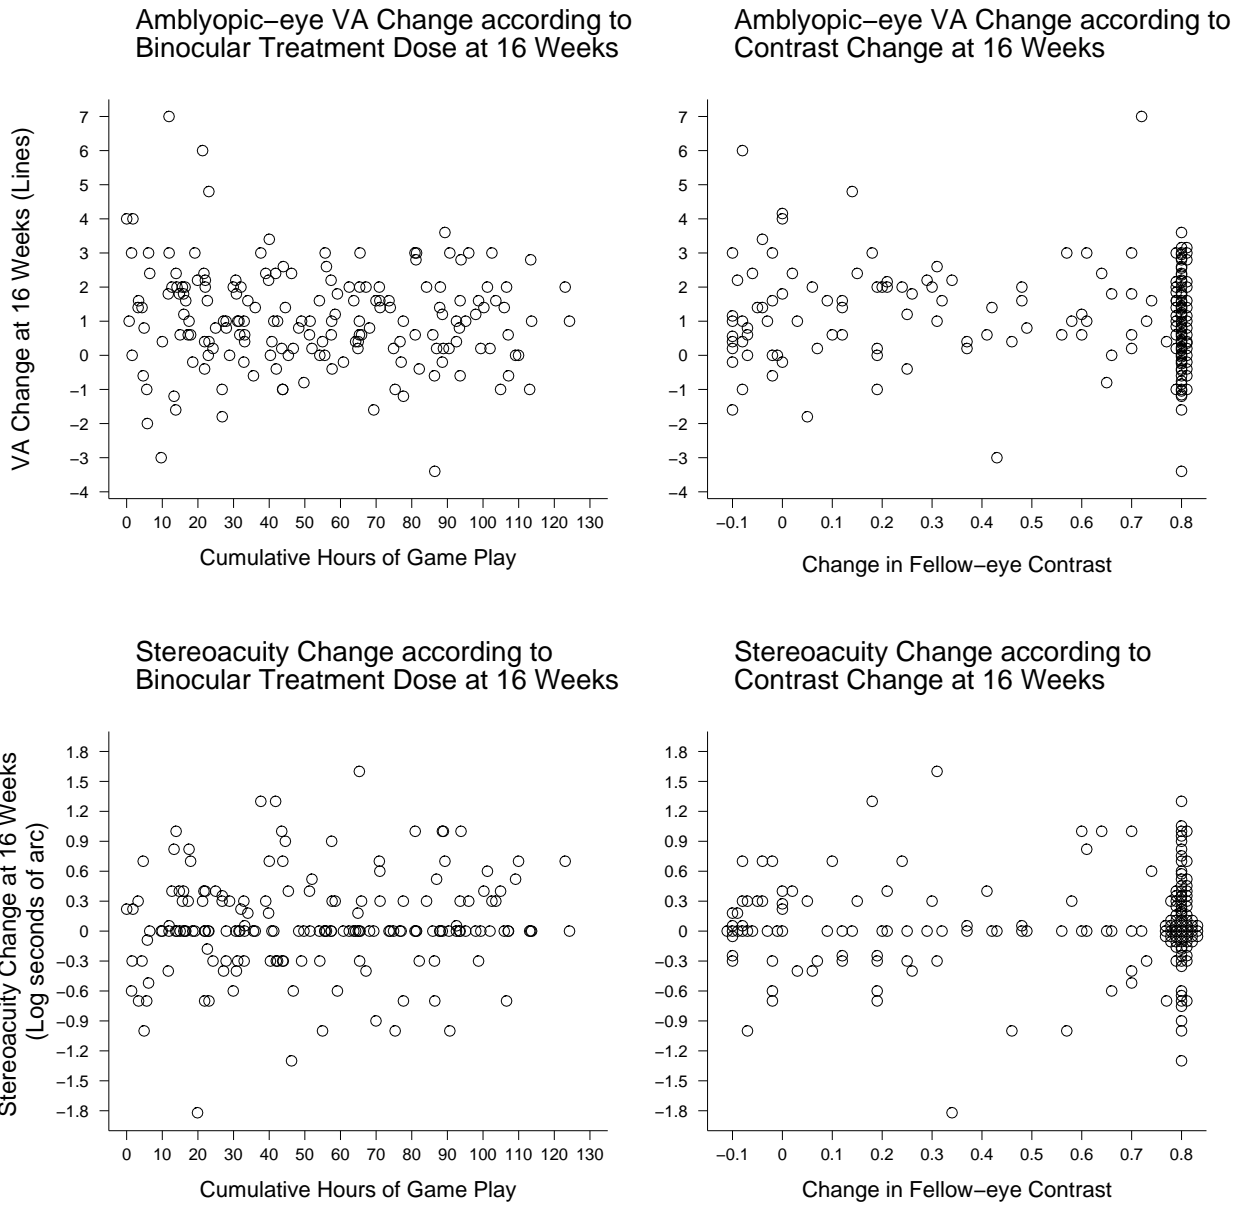

112  
113

114 **eFigure 4. Relationship between Change in Amblyopic-Eye VA from Baseline to 4**  
 115 **Weeks and Objective Compliance Measures in the Binocular Group at 4 Weeks**  
 116 **according to Baseline Subgroups of Age with and without Prior Amblyopia**  
 117 **Treatment**

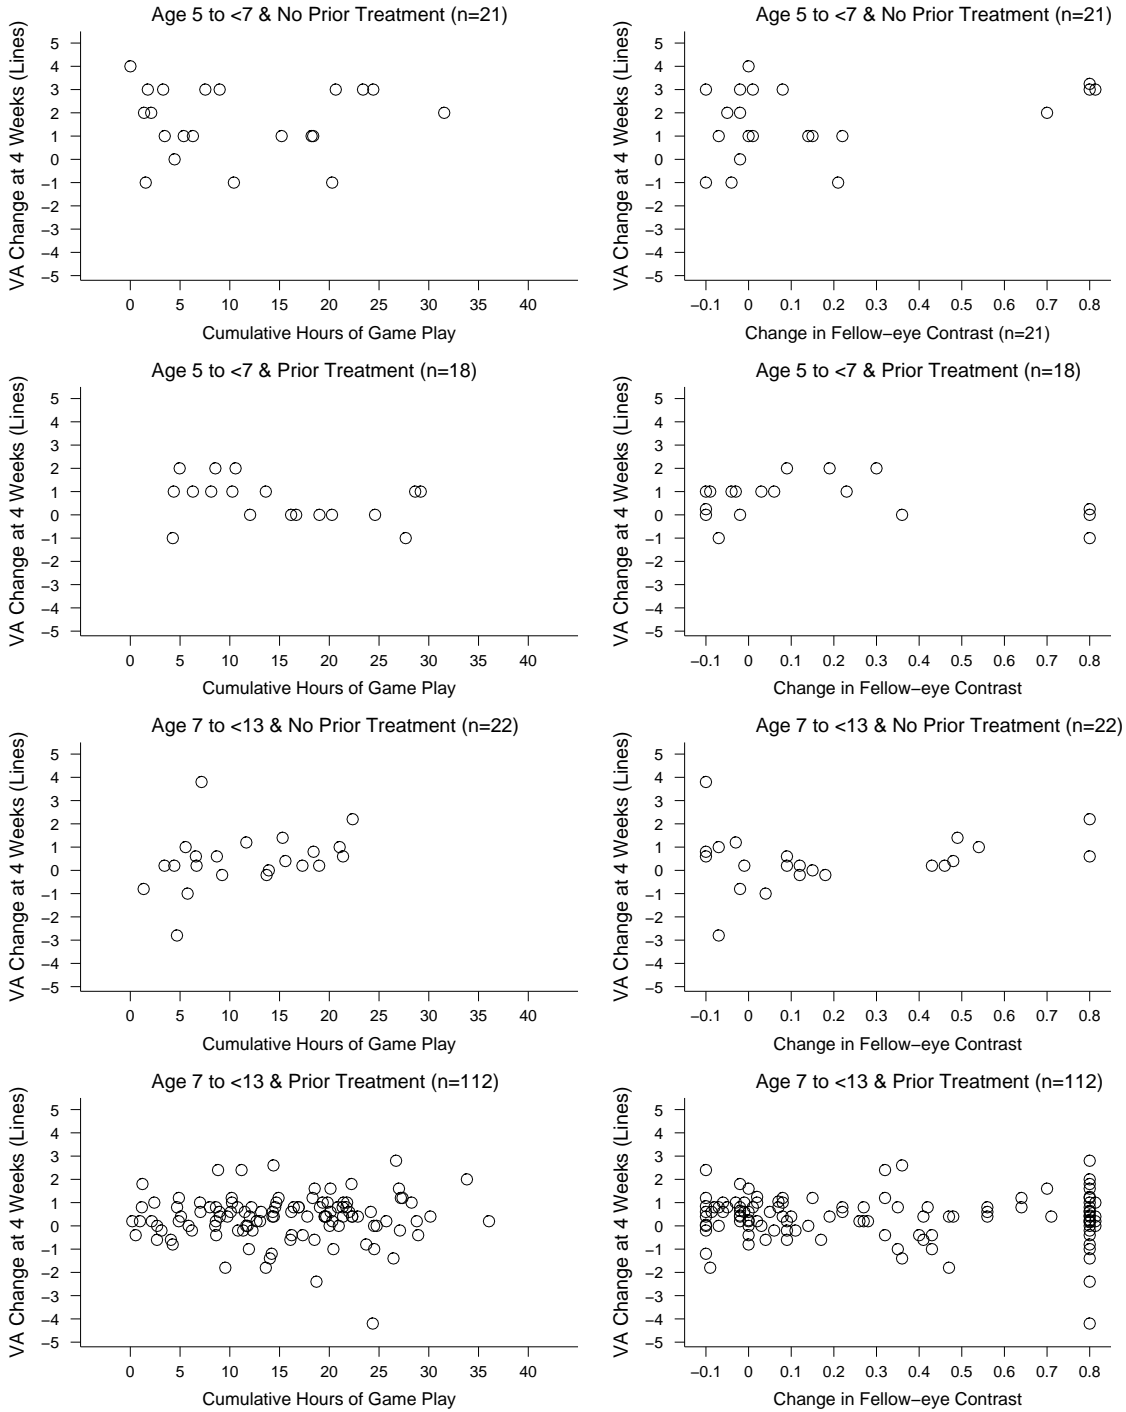

118  
 119  
 120

121 **eFigure 5. Relationship between Change in Amblyopic-Eye VA from Baseline to**  
 122 **16 Weeks and Objective Compliance Measures in the Binocular Group at 16**  
 123 **Weeks according to Baseline Subgroups of Age with and without Prior Amblyopia**  
 124 **Treatment**

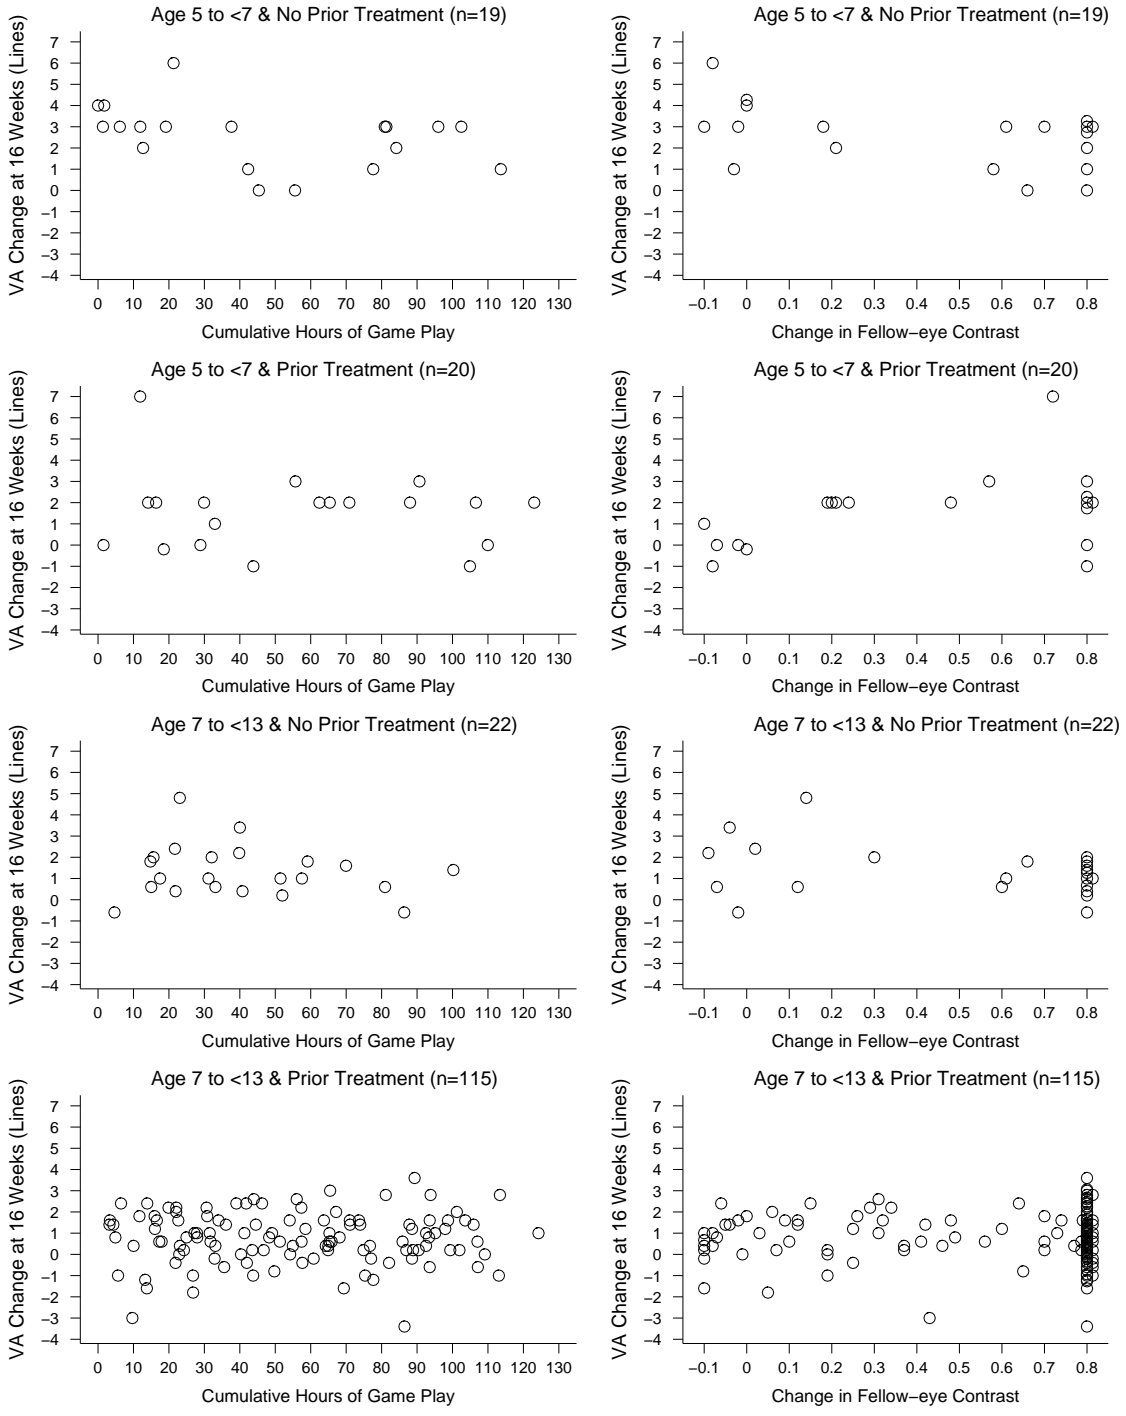

125  
126



127 **eFigure 6. Relationship between Change in Stereoacuity from Baseline to 4**  
 128 **Weeks and Objective Compliance Measures in the Binocular Group at 4 Weeks**  
 129 **according to Baseline Subgroups of Age with and without Prior Amblyopia**  
 130 **Treatment**

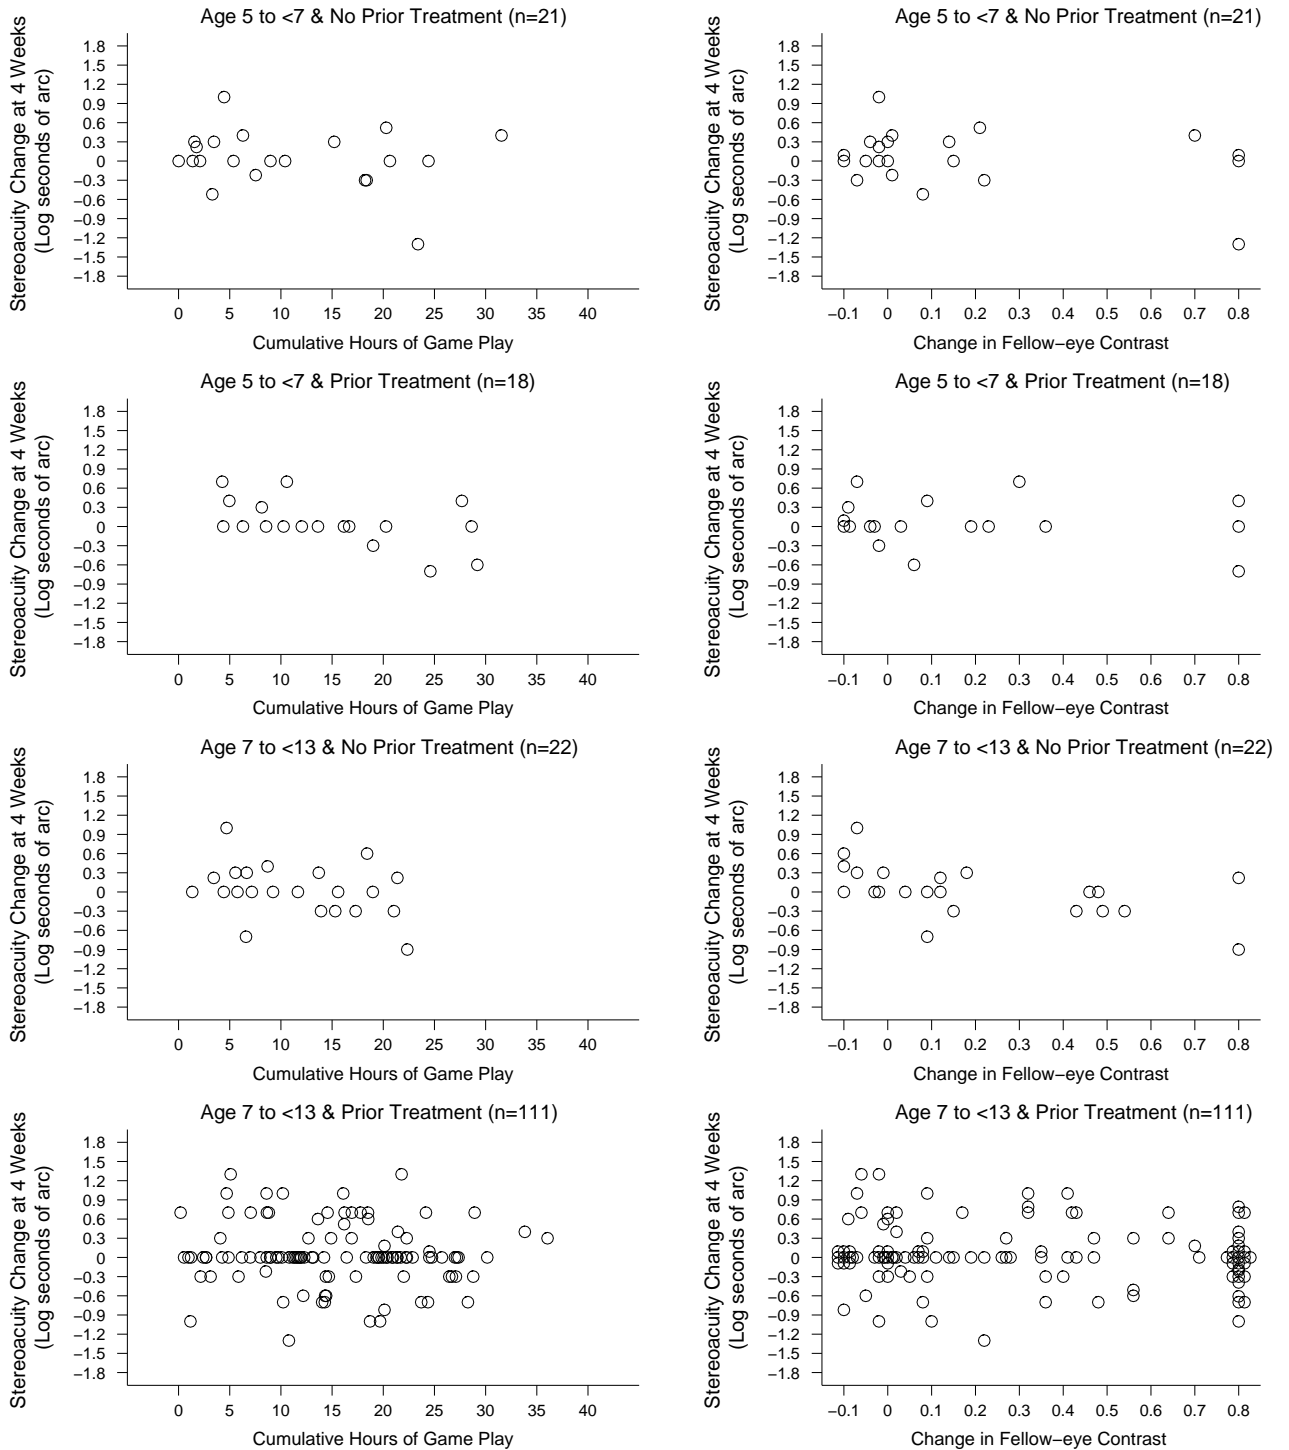

131  
132

133 **eFigure 7. Relationship between Change in Stereoacuity from Baseline to 16**  
 134 **Weeks and Objective Compliance Measures in the Binocular Group at 16 Weeks**  
 135 **according to Baseline Subgroups of Age with and without Prior Amblyopia**  
 136 **Treatment**

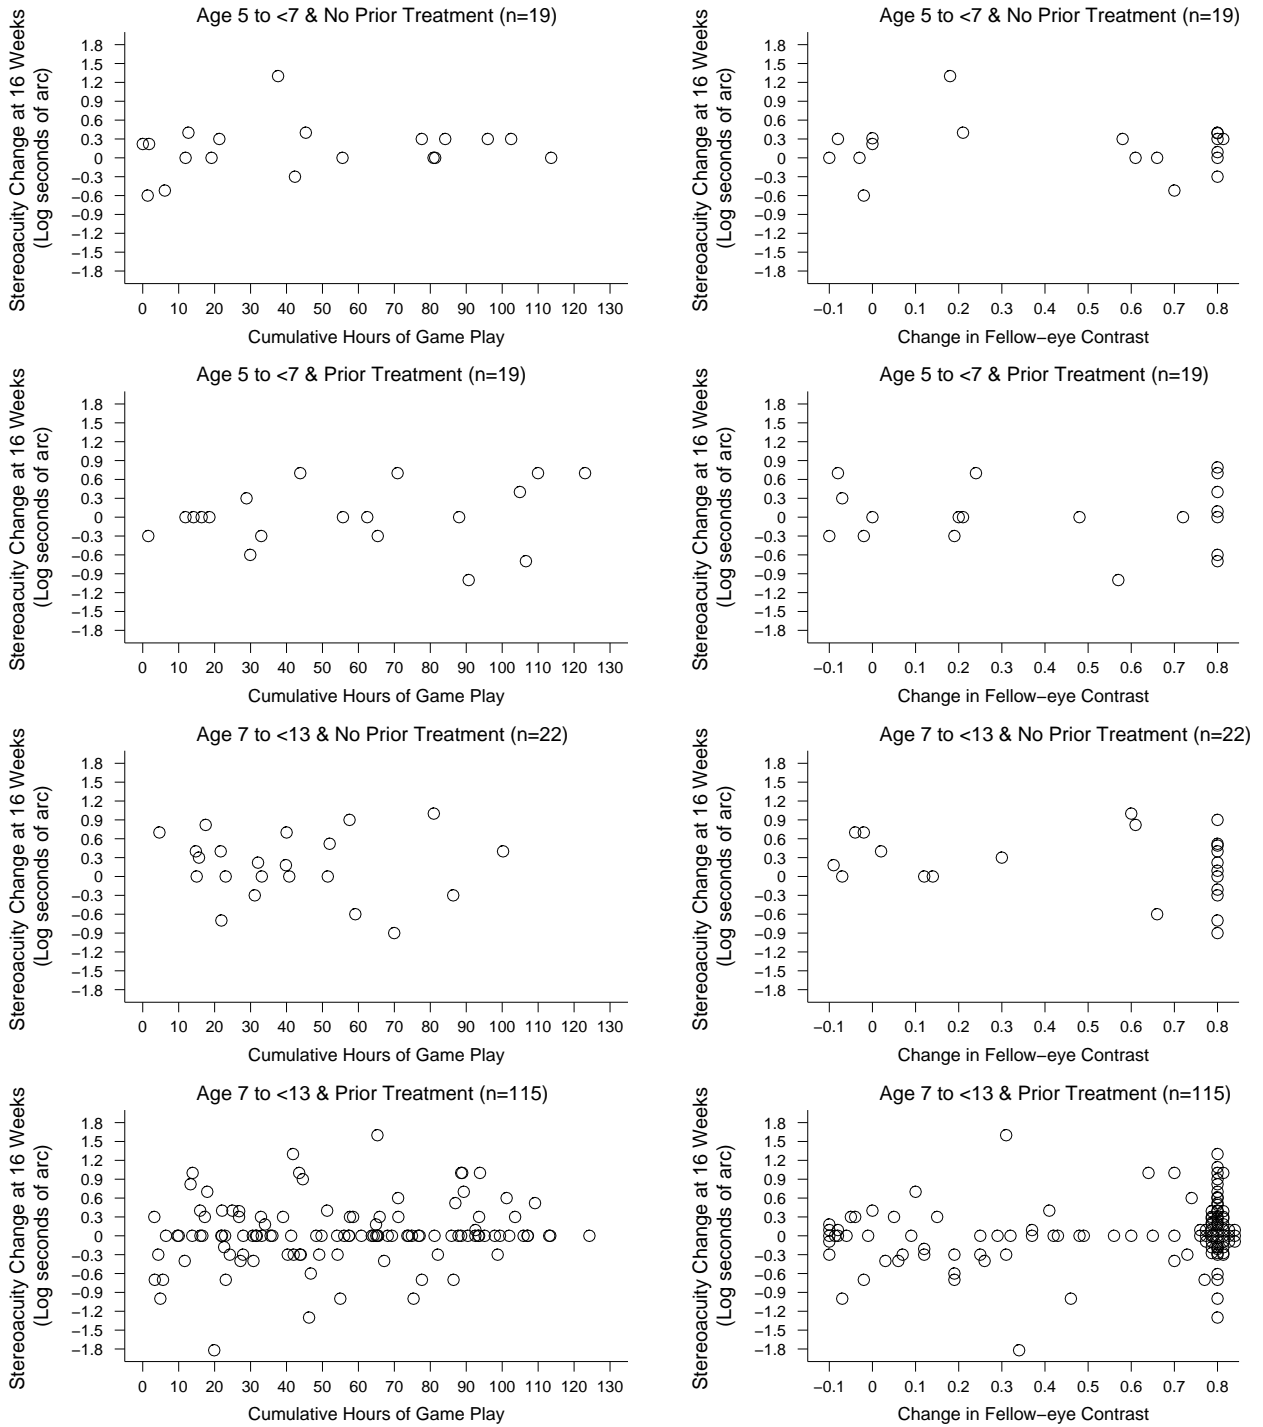

137
